# Supplementary material for: Systematic Identification of Characteristic Genes of Ovarian Clear Cell Carcinoma Compared with High-Grade Serous Carcinoma Based on RNA-Sequencing
Source: MDPI journal article supplement (doi:10.3390/ijms20184330), 2019-09-04
Supplement: s1 [file s1]

## Supporting Information

### Systematic identification of characteristic genes of ovarian clear cell carcinoma compared with high-grade serous carcinoma based on RNA-sequencing

Saya Nagasawa, Kazuhiro Ikeda, Kuniko Horie-Inoue, Sho Sato, Atsuo Itakura, Satoru Takeda, Kosei Hasegawa, Satoshi Inoue

**Supplementary Table S1.** Clinicopathological characteristics of 21 ovarian cancers and 6 normal tissues

**Supplementary Table S2.** Sequence of primers for qRT-PCR

**Supplementary Table S3.** Top 10 pathways enriched in clear cell carcinoma *versus* normal tissues

**Supplementary Table S4.** Top 10 pathways enriched in normal tissues *versus* clear cell carcinoma

**Supplementary Table S5.** Top 10 pathways enriched in high-grade serous carcinoma *versus* normal tissues

**Supplementary Table S6.** Top 10 pathways enriched in normal tissues *versus* high-grade serous carcinoma

**Supplementary Table S7.** Top 10 pathways enriched in clear cell carcinoma *versus* high-grade serous carcinoma

**Supplementary Table S8.** Top 10 pathways enriched in high-grade serous carcinoma *versus* clear cell carcinoma

**Supplementary Figure S1.** Pathway enrichment analysis using PC1-contributing genes in PCA.

**Supplementary Figure S2.** Gene expression levels of *CPNE8* and *BHLHE41* based on Oncomine.

**Supplementary Figure S3.** Up- and down-regulated pathway genes by siRNAs targeting *CPNE8* and *BHLHE41*.

**Supplementary Table S1.** Clinicopathological characteristics of 21 ovarian cancers and 6 normal tissues

| Characteristics | Ovarian cancer subtype or normal tissue |                   |                |
|-----------------|-----------------------------------------|-------------------|----------------|
|                 | Clear cell                              | High-grade serous | Normal tissue* |
| Total cases     | 6                                       | 15                | 6              |
| Patient age     |                                         |                   |                |
| Average         | 57.5                                    | 60.3              | 53.7           |
| Median          | 59.5                                    | 61.0              | 53             |
| Range           | 50-63                                   | 40-80             | 41-66          |
| Menopause       |                                         |                   |                |
| Premenopause    | 1                                       | 3                 | 3              |
| Menopause       | 5                                       | 12                | 3              |
| FIGO Stage      |                                         |                   |                |
| I, II           | 3                                       | 0                 |                |
| III, IV         | 3                                       | 15                |                |

\* Among 6 normal tissues, 5 tissues were obtained from scrape biopsy of the contralateral unaffected ovary in patients with unilateral ovary tumor and one normal tissue was derived from ipsilateral oviduct of benign ovarian tumor (mucinous cyst adenoma).

**Supplementary Table S2.** Sequence of primers for qRT-PCR

| Target Gene     | Forward Primer           | Reverse Primer            |
|-----------------|--------------------------|---------------------------|
| <i>EPHB6</i>    | ATCCAGCTCCTTCAGCAACAC    | GAGTCACGGGTATCGTCATTCTC   |
| <i>MEIS1</i>    | GCACACTGAGTCTTAGCGTTTCTG | CAACTGGGCTTGCGTTATT       |
| <i>FRMD5</i>    | GAGCTGTTACATCTCCATCATG   | GAACGCACTGGTGTGGAATG      |
| <i>EVPLL</i>    | GAGGACTACAGCCGGATTCTGT   | CCAGAAATCCCCTTCATGCA      |
| <i>NOL4L</i>    | GGCAAGAGCGTAGGTTCAATGT   | AGGCCCAATGGACTTTAACAAC    |
| <i>LGR6</i>     | TGTGGTAGGTGCGATTGCA      | GGGCATCGACTGAGGCTAGA      |
| <i>WT1</i>      | ACAGGGTACGAGAGCGATAACC   | CCGTGCGTGTGTATTCTGTATTG   |
| <i>HDAC7</i>    | CAAGAGCAAGCGAAGTGCTGTA   | TTCAGAATCACCTCCGCTAGCT    |
| <i>PRSS1</i>    | TTCTGTGTGGGCTTCCTTGAG    | CACAGGGCCACCAGAATCA       |
| <i>WT1-AS</i>   | GAACCACCGATTGGCAAAGA     | CCTCAGTTTCCTTCTCTGTAAAACG |
| <i>LYPD6</i>    | TCTCAGTCACCAAACGCTGTGT   | GAGTCTCTGCAGCCAGTGATA     |
| <i>BHLHE41</i>  | TAACCGCCTTAACCGAGCAA     | TCAGAGATCGCTCCCCATTTC     |
| <i>FBXO8</i>    | CCATCTTGTCTACCTGAATGCA   | TCGCAAGGTCCTGCCAAA        |
| <i>RAPH1</i>    | AGGGCAGGCTGTGTCAAAGT     | GTTTGAATGGTGACAGGATGCA    |
| <i>CEP44</i>    | GGTGCTCCGCTTGCTAAATT     | CTGCTGGGTCTCCCTTTATCAA    |
| <i>HAVCR1P1</i> | CTGGAATAGAGGCGCACGTT     | GGGTTCCATTGGTCCAGACA      |
| <i>FUT4</i>     | TGAGACGGAGTCTTGCACTGTAG  | GAGGTTGCAGTGAGCCAAGAT     |
| <i>KIAA0513</i> | TCTTAGGATGCAGCCGTCTCA    | GACGCAGCTGGGAAAAAGTG      |
| <i>CPNE8</i>    | CAATATGGACAGCCGCTACAAC   | GCGCTCAGCTGGTTCAAGTC      |
| <i>ARSE</i>     | AGGGAAGCTCACACACCTGATAC  | CGAAAGGGCTGACCAGATGA      |
| <i>CYP2B6</i>   | ATGGAAACCGCTGGAAGGT      | GCTTTCCCATCCCGAAGTC       |
| <i>OPN5</i>     | GTGAAAGCTGGCCTGAAAAGC    | GAGTGTAGCTGCTCCAGTCAGAGA  |
| <i>FAM155A</i>  | GGCTCAGAAATGGCGACTGT     | GTGATCAGAGAGCAGGACTGTGA   |
| <i>RXFP1</i>    | GCCTCAGCTCCTGCACTGTAA    | TGTTGTCTCCACAGTTGTCCTCAT  |

**Supplementary Table S3.** Top 10 pathways enriched in clear cell carcinoma *versus* normal tissues

| GO Term            | Count | P value  | Genes                                                                                                                                                                                                                                                                                                                                                                                                                                                                                                                                                                                                                                                                                                                                                                                                                                                 |
|--------------------|-------|----------|-------------------------------------------------------------------------------------------------------------------------------------------------------------------------------------------------------------------------------------------------------------------------------------------------------------------------------------------------------------------------------------------------------------------------------------------------------------------------------------------------------------------------------------------------------------------------------------------------------------------------------------------------------------------------------------------------------------------------------------------------------------------------------------------------------------------------------------------------------|
| Cell cycle phase   | 86    | 8.67E-33 | <i>KIF23, E2F1, KIFC1, KIF22, XRCC2, PRC1, KNTC1, PKMYT1, TTK, AURKA, AURKB, PTTG1, CD2AP, GTSE1, FAM83D, CUL2, ACVR1B, KIF2C, CCNE1, CDCA8, CDKN2A, CDCA2, TUBG1, FANCA, CCNA2, CDCA5, ASPM, CDCA3, CDC6, CDK1, KIF11, SGOL1, KIF15, CCNF, TPX2, MND1, ESPL1, PBK, TACC3, NCAPD3, RAD51, MAD2L1, TIMELESS, SPAG5, FANCD2, ZWINT, BUB1B, USH1C, KPNA2, BLM, NEK2, USP9X, ANLN, CHEK1, CEP55, SPC25, NCAPH, NCAPG, NCAPG2, OVOL1, BUB1, SKA3, SKA1, ERCC6L, TRIP13, EXO1, MKI67, KIF18A, NUF2, BRCA2, CENPF, CDC20, CENPE, NDC80, BIRC5, SIRT7, CDKN3, RAD54L, SMC4, CCNB1, CCNB2, PLK1, CKS2, RAD54B, CIT, DNM2</i>                                                                                                                                                                                                                                   |
| M phase            | 76    | 4.02E-32 | <i>KIF23, KIFC1, KIF22, XRCC2, PRC1, KNTC1, PKMYT1, TTK, AURKA, AURKB, PTTG1, CD2AP, FAM83D, KIF2C, CDCA8, CDCA2, TUBG1, FANCA, CCNA2, CDCA5, ASPM, CDCA3, CDC6, CDK1, KIF11, SGOL1, CCNF, KIF15, TPX2, MND1, ESPL1, PBK, TACC3, NCAPD3, RAD51, MAD2L1, TIMELESS, SPAG5, FANCD2, ZWINT, BUB1B, KPNA2, NEK2, USP9X, ANLN, CHEK1, CEP55, SPC25, NCAPH, NCAPG, NCAPG2, OVOL1, BUB1, SKA3, SKA1, ERCC6L, TRIP13, EXO1, MKI67, KIF18A, NUF2, BRCA2, CENPF, CDC20, BIRC5, NDC80, CENPE, SIRT7, RAD54L, SMC4, CCNB1, CCNB2, PLK1, CKS2, RAD54B, CIT</i>                                                                                                                                                                                                                                                                                                      |
| Cell cycle         | 118   | 9.59E-32 | <i>KIFC1, XRCC2, PRC1, DTYMK, KNTC1, PKMYT1, TTK, AURKA, AURKB, PTTG1, CD2AP, CUL2, CDCA8, CDKN2A, CDCA2, TUBG1, CCNA2, CDCA5, ASPM, CDCA3, SGOL1, MND1, ESPL1, TACC3, NCAPD3, ESCO2, PPP1CA, UHRF1, KRT18, MAD2L1, TIMELESS, SPAG5, PSMA5, ZWINT, PSMA3, BLM, PKHD1, NEK2, CHEK1, ANLN, CALR, LLGL2, SPC25, NCAPG2, PSMB3, OVOL1, SKA3, SKA1, ERCC6L, CKAP2, MKI67, NUF2, BRCA2, CDC20, NDC80, RAD54L, BRCA1, PSMC4, PLK1, RAD54B, CHAF1A, KIF23, E2F1, KIF22, E2F7, GTSE1, CDT1, FAM83D, CCNE1, ACVR1B, KIF2C, FANCI, PSMD6, ARHGAP8, FANCA, PSMD8, CDK1, CDC6, KIF11, CCNF, KIF15, TPX2, PBK, CDK7, MCM2, CDK5, RAD51, FANCD2, USH1C, BUB1B, PSME3, KPNA2, USP9X, FOXM1, CEP55, NCAPH, NCAPG, HJURP, BUB1, TRIP13, EXO1, KIF18A, CENPF, BIRC5, CENPE, SIRT7, RACGAP1, CDKN3, GSG2, SMC4, CCNB1, PSMD14, CCNB2, PSMD12, PTP4A1, CKS2, CIT, DNM2</i> |
| Mitotic cell cycle | 80    | 1.02E-31 | <i>KIF23, E2F1, KIFC1, KIF22, PRC1, KNTC1, PKMYT1, TTK, AURKA, AURKB, PTTG1, CD2AP, GTSE1, FAM83D, CUL2, ACVR1B, KIF2C, CCNE1, CDCA8, CDKN2A, CDCA2, PSMD6, CDCA5, CCNA2, ASPM, PSMD8, CDCA3, CDC6, CDK1, KIF11, SGOL1, CCNF,</i>                                                                                                                                                                                                                                                                                                                                                                                                                                                                                                                                                                                                                     |

|                               |    |          |                                                                                                                                                                                                                                                                                                                                                                                                                                                                                                                                                                                                                                                                                                           |
|-------------------------------|----|----------|-----------------------------------------------------------------------------------------------------------------------------------------------------------------------------------------------------------------------------------------------------------------------------------------------------------------------------------------------------------------------------------------------------------------------------------------------------------------------------------------------------------------------------------------------------------------------------------------------------------------------------------------------------------------------------------------------------------|
|                               |    |          | <i>KIF15, TPX2, ESPL1, PBK, NCAPD3, MAD2L1, TIMELESS, SPAG5, PSMA5, ZWINT, PSMA3, BUB1B, USH1C, PSME3, KPNA2, BLM, NEK2, USP9X, ANLN, CHEK1, CEP55, SPC25, NCAPH, NCAPG, NCAPG2, PSMB3, BUB1, SKA3, SKA1, ERCC6L, KIF18A, NUF2, CENPF, CDC20, CENPE, BIRC5, NDC80, SIRT7, CDKN3, SMC4, CCNB1, PSMD14, CCNB2, PSMD12, PSMC4, PLK1, CIT, DNM2</i>                                                                                                                                                                                                                                                                                                                                                           |
| Cell cycle process            | 98 | 8.99E-31 | <i>E2F1, KIF23, KIF22, KIFC1, XRCC2, PRC1, KNTC1, TTK, PKMYT1, AURKA, AURKB, PTTG1, CD2AP, GTSE1, FAM83D, KIF2C, ACVR1B, CCNE1, CUL2, CDCA8, CDKN2A, CDCA2, TUBG1, PSMD6, FANCA, CDCA5, CCNA2, ASPM, PSMD8, CDCA3, CDC6, CDK1 KIF11, SGOL1, KIF15, CCNF, TPX2, MND1, ESPL1, PBK, TACC3, NCAPD3, RAD51, MAD2L1, TIMELESS, SPAG5, FANCD2, PSMA5, ZWINT, PSMA3, USH1C, BUB1B, PSME3, KPNA2, BLM, NEK2, USP9X, CHEK1, ANLN, CEP55, CALR, SPC25, NCAPH, NCAPG2, NCAPG, PSMB3, OVOL1, BUB1, SKA3, SKA1, ERCC6L, TRIP13, EXO1, MKI67, KIF18A, NUF2, CENPF, BRCA2, CENPE, BIRC5, NDC80, CDC20, SIRT7, RACGAP1, CDKN3, RAD54L, BRCA1, SMC4, CCNB1, PSMD14, CCNB2, PSMC4, PSMD12, PLK1, CKS2, RAD54B, CIT, DNM2</i> |
| M phase of mitotic cell cycle | 57 | 2.64E-26 | <i>KIF23, KIF22, KIFC1, KNTC1, PKMYT1, AURKA, PTTG1, AURKB, CD2AP, FAM83D, KIF2C, CDCA8, CDCA2, CDCA5, CCNA2, ASPM, CDCA3, CDC6, CDK1, KIF11, SGOL1, CCNF, KIF15, TPX2, ESPL1, PBK, NCAPD3, MAD2L1, TIMELESS, SPAG5, ZWINT, BUB1B, NEK2, USP9X, ANLN, CEP55, SPC25, NCAPH, NCAPG, NCAPG2, BUB1, SKA3, SKA1, ERCC6L, KIF18A, NUF2, CENPF, CDC20, BIRC5, NDC80, CENPE, SIRT7, SMC4, CCNB1, CCNB2, PLK1, CIT</i>                                                                                                                                                                                                                                                                                             |
| Nuclear division              | 56 | 7.49E-26 | <i>KIF23, KIF22, KIFC1, KNTC1, PKMYT1, AURKA, PTTG1, AURKB, CD2AP, FAM83D, KIF2C, CDCA8, CDCA2, CDCA5, CCNA2, ASPM, CDCA3, CDC6, CDK1, KIF11, SGOL1, CCNF, KIF15, TPX2, ESPL1, PBK, NCAPD3, MAD2L1, TIMELESS, SPAG5, ZWINT, BUB1B, NEK2, USP9X, ANLN, CEP55, SPC25, NCAPH, NCAPG, NCAPG2, BUB1, SKA3, SKA1, ERCC6L, KIF18A, NUF2, CENPF, BIRC5, NDC80, CENPE, CDC20, SMC4, CCNB1, CCNB2, PLK1, CIT</i>                                                                                                                                                                                                                                                                                                    |
| Mitosis                       | 56 | 7.49E-26 | <i>KIF23, KIF22, KIFC1, KNTC1, PKMYT1, AURKA, PTTG1, AURKB, CD2AP, FAM83D, KIF2C, CDCA8, CDCA2, CDCA5, CCNA2, ASPM, CDCA3, CDC6, CDK1, KIF11, SGOL1, CCNF, KIF15, TPX2, ESPL1, PBK, NCAPD3, MAD2L1, TIMELESS, SPAG5, ZWINT, BUB1B, NEK2, USP9X, ANLN, CEP55, SPC25, NCAPH, NCAPG, NCAPG2, BUB1, SKA3, SKA1, ERCC6L, KIF18A, NUF2, CENPF, BIRC5, NDC80, CENPE, CDC20, SMC4, CCNB1, CCNB2, PLK1, CIT</i>                                                                                                                                                                                                                                                                                                    |

---

|                      |    |          |                                                                                                                                                                                                                                                                                                                                                                                                                                            |
|----------------------|----|----------|--------------------------------------------------------------------------------------------------------------------------------------------------------------------------------------------------------------------------------------------------------------------------------------------------------------------------------------------------------------------------------------------------------------------------------------------|
| Organelle<br>fission | 57 | 8.75E-26 | <i>KIF23, KIF22, KIFC1, KNTC1, PKMYT1, AURKA, PTTG1, AURKB, CD2AP, FAM83D, KIF2C, CDCA8, CDCA2, CDCA5, CCNA2, ASPM, CDCA3, CDC6, CDK1, KIF11, SGOL1, CCNF, KIF15, TPX2, ESPL1, PBK, NCAPD3, MAD2L1, TIMELESS, SPAG5, ZWINT, BUB1B, NEK2, USP9X, ANLN, CEP55, SPC25, NCAPH, NCAPG, NCAPG2, BUB1, SKA3, SKA1, ERCC6L, KIF18A, NUF2, CENPF, CDC20, BIRC5, NDC80, CENPE, SMC4, CCNB1, CCNB2, PLK1, BAX, CIT</i>                                |
| Cell division        | 61 | 4.44E-23 | <i>KIF23, KIFC1, PRC1, KNTC1, PTTG1, AURKB, CD2AP, FAM83D, TOP1, CCNE1, CDCA8, CDKN2A, CDCA2, CDCA5, CCNA2, ASPM, CDCA3, CDC6, CDK1, KIF11, SGOL1, CCNF, ESPL1, CDK7, CDK5, NCAPD3, PPP1CA, MAD2L1, TIMELESS, SPAG5, ZWINT, BUB1B, PKHD1, NEK2, USP9X, ANLN, CEP55, LLGL2, SPC25, NCAPH, NCAPG, NCAPG2, BUB1, SKA3, SKA1, ERCC6L, NUF2, CENPF, BRCA2, CDC20, BIRC5, NDC80, CENPE, RACGAP1, SMC4, CCNB1, CCNB2, PLK1, ANXA11, CKS2, CIT</i> |

---

**Supplementary Table S4.** Top 10 pathways enriched in normal tissues *versus* clear cell carcinoma

| GO Term                     | Count | P value  | Genes                                                                                                                                                                                                                                                                                                                                                                                                                                                                                                                                                                                                                                                                                                                                                                                                                                                                                                                                                                                                                                                                                                                                                                                                                                                                                                                                                   |
|-----------------------------|-------|----------|---------------------------------------------------------------------------------------------------------------------------------------------------------------------------------------------------------------------------------------------------------------------------------------------------------------------------------------------------------------------------------------------------------------------------------------------------------------------------------------------------------------------------------------------------------------------------------------------------------------------------------------------------------------------------------------------------------------------------------------------------------------------------------------------------------------------------------------------------------------------------------------------------------------------------------------------------------------------------------------------------------------------------------------------------------------------------------------------------------------------------------------------------------------------------------------------------------------------------------------------------------------------------------------------------------------------------------------------------------|
| Transcription               | 181   | 4.42E-16 | <p>MEF2C, THRA, TCEAL6, ZNF781, BBX, APOBEC3G, TCEAL7, TCEAL2, TCEAL1, TCEAL4, FOXO6, ZXDA, GTF2IRD2B, TCEAL3, HOXC6, PGR, ZFP92, EPC2, ZNF181, CRY2, CGGBP1, GATA6, ZFP90, PSIP1, ZNF442, ZNF397, ZNF395, RARA, ATOH8, SAP30L, FOXO3B, ZNF575, TWIST2, GABPB2, ZNF43, ZNF641, ZNF594, RCOR3, RXRA, ZHX1, MECP2, GTF2IRD2, HMG20A, ARID1B, TRERF1, PROX1, FOXN3, PRDM8, PTRF, ZNF197, PRDM5, ZNF383, PRDM2, TGFB1I1, ZIM2, CRT3, ZNF519, TSHZ3, EID1, TSHZ2, ZNF430, ZNF132, TADA3, ZNF514, WT1, ZNF512, NR2C2, ARNT, HTATSF1, TFDP2, TEF, ZNF425, ZNF599, MAML3, TCF4, ASF1A, ZNF70, ASXL3, ZNF529, TAF3, SMAD9, KLF12, SMAD5, TAF7, ZNF621, ZNF521, KLF15, MED13L, ZNF835, FOXP1, SALL2, CSRNP3, PHF1, DMTF1, EBF1, ATF7, ZIK1, KLF2, POU6F1, ZNF83, ZBTB33, BACH2, ELF2, ZNF532, EID2B, ZEB2, GLI2, GLI3, KCNIP3, MAX, ZNF738, HSF2, ANG, CCDC101, ZNF540, ZNF496, ZNF493, NR2F1, ZBTB22, SOX10, AR, ELP2, ZNF280D, FOXJ2, POLR1E, SPEN, ZFP28, ZNF333, ZNF688, NRIP2, PURA, ZMIZ1, ASH1L, ZNF711, ZFPM2, JMJD1C, ZNF33B, ZNF483, SUPT3H, ZNF275, NDN, SCML1, NFIX, ZBTB16, PRDM16, CALCOCO1, HIC1, ZNF660, NPAS3, TSPYL2, NR1D1, HAND2, NR1D2, ZNF708, ZNF286A, PER3, BAZ2B, CHD5, MAF, KAT2B, TBX3, AFF3, ZNF25, SNAI2, ZNF358, ZNF662, ATXN3, PHF19, BNC2, ZNF862, SP4, PHF21A, MAMLD1, DENND4A, ZBTB2, PBX1, PAPOLG, NFIC, APBB1, NFIA, NFIB</p> |
| Regulation of transcription | 204   | 5.25E-14 | <p>MEF2C, ZNF781, BBX, GTF2IRD2B, ZFP92, PGR, EPC2, CRY2, ZFP90, ZNF397, ZNF395, RARA, SAP30L,</p>                                                                                                                                                                                                                                                                                                                                                                                                                                                                                                                                                                                                                                                                                                                                                                                                                                                                                                                                                                                                                                                                                                                                                                                                                                                      |

FOXO3B, TIGD7, TWIST2, ZNF43, ZNF641, RCOR3,  
 RXRA, ZHX1, MECP2, HMG20A, PROX1, PRDM8, PTRF,  
 PRDM5, ZNF383, PRDM2, TGFB1I1, ZIM2, CRTC3,  
 ZNF519, ZNF132, TADA3, AFAP1L2, ZNF514, ZNF512,  
 JRK, HTATSF1, MAML3, TCF4, ZNF70, TCF23, BMP4,  
 ASXL3, ZNF529, SMAD9, KLF12, ZNF621, SMAD5,  
 ZNF521, KLF15, SFMBT2, CSRNP3, DMTF1, ZIK1, KLF2,  
 ENG, ZBTB33, BACH2, ELF2, ZNF532, EID2B, ZEB2,  
 GLI2, GLI3, KCNIP3, PBXIP1, ZNF738, HSF2, ZNF540,  
 ZNF496, ZNF493, CSDC2, NR2F1, ZBTB22, AR, SPEN,  
 ZNF333, ZNF688, ASH1L, ZNF33B, ZNF483, ZNF275,  
 SCML1, ZBTB16, ZNF660, NR1D1, NR1D2, CSDE1,  
 ZNF286A, PER3, BAZ2B, TBX3, ZNF25, AFF3, SNAI2,  
 ZNF358, ZNF662, PKNOX2, PHF19, ZNF862, BNC2,  
 PHF21A, ZBTB2, PBX1, APBB1, THRA, CCDC85B,  
 TCEAL6, TCEAL7, TCEAL2, TCEAL1, TCEAL4, FOXO6,  
 ZXDA, TCEAL3, HOXC6, ZNF181, GATA6, CGGBP1,  
 PSIP1, ZNF442, ATOH8, ZNF575, GABPB2, ZNF594,  
 SATB1, GTF2IRD2, ARID1B, TRERF1, FOXN3, KRBA2,  
 ZNF197, EID1, TSHZ3, TSHZ2, ZNF430, NR2C2, WT1,  
 ARNT, MEIS2, TEF, TFDP2, ZNF425, ZNF599, ASF1A,  
 TAF3, RFX7, TAF7, LMCD1, MED13L, ZNF835, FOXP1,  
 SALL2, PHF1, ATF7, EBF1, ABL1, POU6F1, ZNF83,  
 PDCC4, MAX, CCDC101, SOX15, SOX10, ELP2, FOXJ2,  
 ZNF280D, LDB1, ZFP28, NRIP2, PURA, ZMIZ1, ZNF711,  
 ZFPM2, JMJD1C, MAPRE3, SUPT3H, NDN, NFIX,  
 HCFC2, PRDM16, CALCOCO1, HIC1, TSC22D3, RGMB,  
 TSPYL2, NPAS3, HAND2, ZNF708, CHD5, MAF, KAT2B,  
 ATXN3, SP4, MAMLD1, DENND4A, JAK2, ID3, NFIC,  
 NFIA, NFIB

DNA binding

179

4.65E-11

MEF2C, THRA, ZNF781, BBX, H1FX, RFXAP, TCEAL1,  
 FOXO6, ZXDA, GTF2IRD2B, HOXC6, PGR, ZFP92,  
 ZNF181, CGGBP1, GATA6, ZFP90, PSIP1, ZNF442,  
 ZNF397, ZNF395, RARA, ATOH8, FOXO3B, ZNF575,



|                                               |     |          |                                                                                                                                                                                                                                                                                                                                                                                                                                                                                                                                                                                                                                                                                                                                                                                                                                                                                                                                                                                                                                                                                                                                              |
|-----------------------------------------------|-----|----------|----------------------------------------------------------------------------------------------------------------------------------------------------------------------------------------------------------------------------------------------------------------------------------------------------------------------------------------------------------------------------------------------------------------------------------------------------------------------------------------------------------------------------------------------------------------------------------------------------------------------------------------------------------------------------------------------------------------------------------------------------------------------------------------------------------------------------------------------------------------------------------------------------------------------------------------------------------------------------------------------------------------------------------------------------------------------------------------------------------------------------------------------|
|                                               |     |          | <p> <i>TIGD7, TWIST2, ZNF43, SATB1, ZNF641, ZNF594, RCOR3, RXRA, ZHX1, MECP2, GTF2IRD2, HMG20A, ARID1B, TRERF1, PROX1, FOXN3, PRDM8, KRBA2, ZNF197, PRDM5, ZNF383, PRDM2, ZIM2, ZNF519, TSHZ3, TSHZ2, ZNF430, ZNF132, TADA3, CXXC4, ZNF514, WT1, ZNF512, NR2C2, ARNT, JRK, RPS27, MEIS2, TFDP2, TEF, ZNF425, ZNF599, TCF4, ZNF70, ZNF529, TAF3, SMAD9, SETDB2, SMG6, KLF12, RFX7, SMAD5, TAF7, ZNF621, ZNF521, KLF15, ZNF835, FOXP1, ATM, SALL2, CSRNP3, PHF1, DMTF1, EBF1, ATF7, ZIK1, KLF2, ABL1, PRKRIR, NYNRIN, POU6F1, ZNF83, ZBTB33, BACH2, ELF2, ZNF532, HP1BP3, ZEB2, GLI2, GLI3, KCNIP3, MAX, ZNF738, HSF2, ANG, SETMAR, ZNF540, SOX15, ZNF496, ZNF493, CSDC2, NR2F1, ZBTB22, SOX10, AR, ELP2, ZNF280D, FOXJ2, POLR1E, LDB1, SPEN, ZFP28, ZNF333, ZNF688, PURA, ASH1L, ZNF711, ZFPM2, ZNF33B, ZNF483, SUPT3H, ZNF275, NDN, SCML1, ABI2, NFIX, ZBTB16, PRDM16, HIC1, ZNF660, ZFP36L2, TSC22D3, NPAS3, TSPYL2, NR1D1, HAND2, NR1D2, SOS1, ZNF708, CSDE1, ZNF286A, BAZ2B, CHD5, MAF, PDS5B, TBX3, AFF3, ZNF25, SNAI2, ZNF358, ZNF662, TRIM21, PKNOX2, BNC2, SP4, ZRANB2, PHF21A, DENND4A, ZBTB2, PBX1, OGG1, NFIC, NFIA, NFIB</i> </p> |
| Regulation of transcription,<br>DNA-dependent | 142 | 4.35E-10 | <p> <i>MEF2C, THRA, TCEAL1, FOXO6, PGR, ZFP92, HOXC6, ZNF181, GATA6, ZFP90, ZNF397, ZNF442, ZNF395, RARA, FOXO3B, TWIST2, ZNF43, ZNF641, SATB1, RXRA, ZHX1, MECP2, HMG20A, ARID1B, PROX1, TRERF1, FOXN3, KRBA2, ZNF197, ZNF383, PRDM2, TGFB1I1, ZIM2, ZNF519, TSHZ3, EID1, ZNF430, TSHZ2, ZNF132, TADA3, AFAP1L2, ZNF514, WT1, NR2C2, ARNT, MEIS2, HTATSF1, TFDP2, TEF, ZNF425, ZNF599, MAML3, TCF4, ASF1A, ZNF70, BMP4, ZNF529, SMAD9, KLF12, RFX7, SMAD5, TAF7, ZNF621, LMCD1, KLF15,</i> </p>                                                                                                                                                                                                                                                                                                                                                                                                                                                                                                                                                                                                                                             |

|                                     |     |          |                                                                                                                                                                                                                                                                                                                                                                                                                                                                                                                                                                                                                                                                                                                                                                                                                                                                                                                                                                                                                                                                    |
|-------------------------------------|-----|----------|--------------------------------------------------------------------------------------------------------------------------------------------------------------------------------------------------------------------------------------------------------------------------------------------------------------------------------------------------------------------------------------------------------------------------------------------------------------------------------------------------------------------------------------------------------------------------------------------------------------------------------------------------------------------------------------------------------------------------------------------------------------------------------------------------------------------------------------------------------------------------------------------------------------------------------------------------------------------------------------------------------------------------------------------------------------------|
|                                     |     |          | <p><i>MED13L, FOXP1, SALL2, CSRNP3, DMTF1, EBF1, ATF7, ZIK1, ABL1, ENG, POU6F1, ZNF83, BACH2, ELF2, ZEB2, GLI2, KCNIP3, ZNF738, HSF2, ZNF540, SOX15, ZNF496, ZNF493, NR2F1, CSDC2, SOX10, ELP2, AR, FOXJ2, LDB1, SPEN, ZFP28, ZNF333, ZNF688, NRIP2, PURA, ZMIZ1, ZFPM2, JMJD1C, ZNF33B, ZNF483, MAPRE3, SUPT3H, ZNF275, NDN, HCFC2, NFIX, ZBTB16, PRDM16, CALCOCO1, HIC1, TSC22D3, NPAS3, NR1D1, HAND2, NR1D2, ZNF708, CSDE1, ZNF286A, PER3, MAF, KAT2B, TBX3, ZNF25, SNAI2, ZNF662, PKNOX2, ZNF862, SP4, PHF21A, DENND4A, PBX1, ID3, NFIC, APBB1, NFIA, NFIB</i></p>                                                                                                                                                                                                                                                                                                                                                                                                                                                                                             |
| Regulation of RNA metabolic process | 144 | 5.52E-10 | <p><i>MEF2C, THRA, TCEAL1, FOXO6, PGR, ZFP92, HOXC6, ZNF181, GATA6, ZFP90, ZNF397, ZNF442, ZNF395, RARA, FOXO3B, TWIST2, ZNF43, ZNF641, SATB1, RXRA, ZHX1, MECP2, HMG20A, ARID1B, PROX1, TRERF1, FOXN3, KRBA2, CELF6, ZNF197, ZNF383, PRDM2, TGFB1I1, ZIM2, ZNF519, TSHZ3, EID1, ZNF430, TSHZ2, ZNF132, TADA3, AFAP1L2, ZNF514, WT1, NR2C2, ARNT, MEIS2, HTATSF1, TFDP2, TEF, ZNF425, ZNF599, MAML3, TCF4, ASF1A, ZNF70, BMP4, ZNF529, SMAD9, KLF12, RFX7, SMAD5, TAF7, ZNF621, LMCD1, KLF15, MED13L, FOXP1, SALL2, CSRNP3, DMTF1, EBF1, ATF7, ZIK1, ABL1, ENG, POU6F1, ZNF83, BACH2, ELF2, ZEB2, GLI2, KCNIP3, ZNF738, HSF2, ZNF540, SOX15, ZNF496, ZNF493, NR2F1, CSDC2, SOX10, ELP2, AR, FOXJ2, LDB1, SPEN, ZFP28, ZNF333, ZNF688, NRIP2, PURA, ZMIZ1, ZFPM2, JMJD1C, ZNF33B, ZNF483, MAPRE3, SUPT3H, ZNF275, NDN, HCFC2, NFIX, ZBTB16, PRDM16, CALCOCO1, HIC1, ZFP36L2, TSC22D3, NPAS3, NR1D1, HAND2, NR1D2, ZNF708, CSDE1, ZNF286A, PER3, MAF, KAT2B, TBX3, ZNF25, SNAI2, ZNF662, PKNOX2, ZNF862, SP4, PHF21A, DENND4A, PBX1, ID3, NFIC, APBB1, NFIA,</i></p> |

| NFIB              |     |          |                                                                                                                                                                                                                                                                                                                                                                                                                                                                                                                                                                                                                                                                                                                                                                                                                                                                                                                                                                                                                                                                                                                                                                                                                                                                                                                                                                                                                                                                                                                                                                                                       |
|-------------------|-----|----------|-------------------------------------------------------------------------------------------------------------------------------------------------------------------------------------------------------------------------------------------------------------------------------------------------------------------------------------------------------------------------------------------------------------------------------------------------------------------------------------------------------------------------------------------------------------------------------------------------------------------------------------------------------------------------------------------------------------------------------------------------------------------------------------------------------------------------------------------------------------------------------------------------------------------------------------------------------------------------------------------------------------------------------------------------------------------------------------------------------------------------------------------------------------------------------------------------------------------------------------------------------------------------------------------------------------------------------------------------------------------------------------------------------------------------------------------------------------------------------------------------------------------------------------------------------------------------------------------------------|
| Metal ion binding | 271 | 2.05E-09 | <p> <i>ADCY2, LTBP3, ATP1B2, SCN3B, LTBP4, SNCA, ZNF781, SYT9, GTF2IRD2B, FAH, ZFP92, PGR, ZFP90, CCBE1, ZNF397, RARA, ZNF395, SCD5, CDH23, ZNF43, MATN2, NUDT16, ZNF641, CGRRF1, RXRA, ZHX1, F8, NUDT10, NUDT11, LPCAT2, PRDM8, PGM5, PRDM5, ZNF383, RYR2, NEK9, PRDM2, TGFB1I1, ADAMTS3, ADD1, ZIM2, ZNF519, ZNF132, NEK1, CACNB2, CACNB3, ZNF514, ZNF512, RPS27, CDADC1, FAHD2B, ZNF70, TRPC1, ASXL3, ZC3H13, ZNF529, CYP46A1, KLF12, PCDH10, ZNF621, SMYD4, ZNF521, KLF15, PCDH19, PRPSAP2, PCDH18, KCNJ8, HEBP1, SYTL4, ZIK1, HEPH, KLF2, PRKRIR, ZBTB33, ZCCHC24, CACHD1, PCDHA3, ZNF532, SOBP, ZEB2, GLI2, KCNIP2, GLI3, VILL, KCNIP3, SLC23A2, ZNF540, ZNF496, MBLAC2, ZNF493, NR2F1, ZBTB22, AR, PCDH11X, PCDHB4, ZNF333, ZNF688, PJA2, ZDHHHC15, PJA1, NAALAD2, ZDHHHC17, MAST2, ASH1L, EGFL8, ZNF33B, ZNF483, PLA2G5, ZNF275, SCAPER, PCDHB15, ZBTB16, DCHS1, PLCL2, ZNF660, CYB561D2, ZFP36L2, PLCL1, NR1D1, MORC3, DGKD, NR1D2, FAT4, HAAO, SLC4A8, ZNF286A, BAZ2B, RASA4, DTNA, CCNB1IP1, RBM20, MEX3B, ZNF25, PDZRN3, SNAI2, TRIM23, ZNF662, ZNF358, TRIM21, LRP1, PHF19, PLSCR4, FYN, BNC2, SVIL, ZNF862, PHF21A, CHN2, ZBTB2, LRP4, THRA, ZAK, APOBEC3G, TRIM52, ZXDA, ZNF181, GATA6, RNF38, ZNF442, ZNF575, RNF146, NMNAT3, ZNF594, PCDHGA11, GTF2IRD2, CDO1, TRERF1, PLCE1, KCNT2, RASGRF2, ZNF197, MFAP4, DST, SLC40A1, PRPS1, ME1, TSHZ3, TSHZ2, ZNF430, CXXC4, EXTL2, ZC3H6, NR2C2, WT1, TRIM68, TTYH2, SRR, ZNF425, ZNF599, UNKL, CACNA2D1, SETDB2, TAF3, SMG6, SYT11, LMCD1, ZNF835, TRIM61, FOXP1, EPS15, SALL2, PHF2, PHF1, ATF7, EBF1, MTR, ANTXR2, RHBDL3, ABL1,</i> </p> |

|             |     |          |                                                                                                                                                                                                                                                                                                                                                                                                                                                                                                                                                                                                                                                                                                                                                                                                                                                                                                                                                                                                                                                                |
|-------------|-----|----------|----------------------------------------------------------------------------------------------------------------------------------------------------------------------------------------------------------------------------------------------------------------------------------------------------------------------------------------------------------------------------------------------------------------------------------------------------------------------------------------------------------------------------------------------------------------------------------------------------------------------------------------------------------------------------------------------------------------------------------------------------------------------------------------------------------------------------------------------------------------------------------------------------------------------------------------------------------------------------------------------------------------------------------------------------------------|
|             |     |          | <p>ZNF83, CLSTN2, PCDHGA8, ZCWPW2, PCDHGA7, ZCWPW1, PCDHGA6, PCDHGA5, PCDHGA3, PCDHGA2, PCDHGA1, TRIM4, OSR2, ANG, SETMAR, ATP8B2, ANO6, CDK15, ZNF280D, WBSCR17, PCDH9, PCDHGB6, PFKM, NRXN1, ZFP28, PCDHGB2, PCDHGB5, PCDHGB4, ZMIZ1, ZNF711, ZFPM2, JMJD1C, PRNP, PROS1, CYP2U1, LOC375196, FKBP7, PCDHGC5, PCDHGC4, PCDHGC3, PRDM16, NAALADL1, HIC1, CPZ, ANXA6, SMOC2, AGAP11, ZNF708, ZC3H12B, ZNF609, PLCD1, EHD2, CHD5, HRC, WDFY2, B3GALT2, CYP21A2, DTX3, FAM188A, MAN1C1, SP4, ZRANB2, BMPR1B, ATP8A1</p>                                                                                                                                                                                                                                                                                                                                                                                                                                                                                                                                           |
| Ion binding | 276 | 2.35E-09 | <p>ADCY2, LTBP3, ATP1B2, SCN3B, LTBP4, SNCA, ZNF781, SYT9, GTF2IRD2B, FAH, ZFP92, PGR, ZFP90, CCBE1, ZNF397, RARA, ZNF395, SCD5, CDH23, ZNF43, MATN2, NUDT16, ZNF641, CGRRF1, RXRA, ZHX1, F8, NUDT10, NUDT11, LPCAT2, PRDM8, PGM5, PRDM5, RYR2, ZNF383, NEK9, PRDM2, TGFB1I1, ADAMTS3, ADD1, ZIM2, ZNF519, ZNF132, NEK1, CACNB2, CACNB3, ZNF514, ZNF512, RPS27, CDADC1, FAHD2B, ZNF70, TRPC1, ASXL3, ZC3H13, ZNF529, CYP46A1, KLF12, PCDH10, ZNF621, SMYD4, ZNF521, KLF15, PCDH19, PRPSAP2, PCDH18, KCNJ8, HEBP1, SYTL4, ZIK1, HEPH, KLF2, CLCN6, PRKRIR, ZBTB33, ZCCHC24, CACHD1, PCDHA3, ZNF532, SOBP, ZEB2, GLI2, KCNIP2, GLI3, VILL, KCNIP3, SLC23A2, ZNF540, ZNF496, MBLAC2, ZNF493, NR2F1, ZBTB22, AR, PCDH11X, PCDHB4, CLIC2, ZNF333, ZNF688, PJA2, ZDHHC15, PJA1, NAALAD2, ZDHHC17, MAST2, ASH1L, GLRA4, EGFL8, ZNF33B, ZNF483, PLA2G5, ZNF275, SCAPER, PCDHB15, ZBTB16, DCHS1, PLCL2, ZNF660, CYB561D2, ZFP36L2, PLCL1, NR1D1, MORC3, DGKD, NR1D2, FAT4, HAAO, SLC4A8, ZNF286A, BAZ2B, RASA4, DTNA, CCNB1IP1, RBM20, MEX3B, ZNF25, PDZRN3, SNAI2,</p> |

|                          |     |          |                                                                                                                                                                                                                                                                                                                                                                                                                                                                                                                                                                                                                                                                                                                                                                                                                                                                                                                                                                                                                                                                                              |
|--------------------------|-----|----------|----------------------------------------------------------------------------------------------------------------------------------------------------------------------------------------------------------------------------------------------------------------------------------------------------------------------------------------------------------------------------------------------------------------------------------------------------------------------------------------------------------------------------------------------------------------------------------------------------------------------------------------------------------------------------------------------------------------------------------------------------------------------------------------------------------------------------------------------------------------------------------------------------------------------------------------------------------------------------------------------------------------------------------------------------------------------------------------------|
|                          |     |          | <p> <i>TRIM23, ZNF662, ZNF358, TRIM21, LRP1, PHF19, PLSCR4, FYN, BNC2, SVIL, ZNF862, PHF21A, CHN2, ZBTB2, LRP4, THRA, ZAK, APOBEC3G, TRIM52, ZXDA, ZNF181, GATA6, RNF38, ZNF442, ZNF575, RNF146, NMNAT3, ZNF594, PCDHGA11, GTF2IRD2, CDO1, TRERF1, PLCE1, KCNT2, RASGRF2, ZNF197, MFAP4, DST, SLC40A1, PRPS1, ME1, FXYP1, TSHZ3, TSHZ2, ZNF430, CXXC4, HEXDC, EXTL2, ZC3H6, NR2C2, WT1, TRIM68, TTYH2, SRR, ZNF425, ZNF599, UNKL, CACNA2D1, SETDB2, TAF3, SMG6, SYT11, LMCD1, ZNF835, TRIM61, FOXP1, EPS15, SALL2, PHF2, PHF1, ATF7, EBF1, MTR, ANTXR2, RHBDL3, ABL1, ZNF83, CLSTN2, PCDHGA8, ZCWPW2, PCDHGA7, ZCWPW1, PCDHGA6, PCDHGA5, PCDHGA3, PCDHGA2, PCDHGA1, TRIM4, OSR2, ANG, SETMAR, ATP8B2, ANO6, CDK15, ZNF280D, WBSCR17, PCDH9, PCDHGB6, PFKM, NRXN1, ZFP28, PCDHGB2, PCDHGB5, PCDHGB4, ZMIZ1, ZNF711, ZFPM2, JMJD1C, PRNP, PROS1, CYP2U1, LOC375196, FKBP7, PCDHGC5, PCDHGC4, PCDHGC3, PRDM16, NAALADL1, HIC1, CPZ, ANXA6, SMOC2, AGAP11, ZNF708, ZC3H12B, ZNF609, PLCD1, EHD2, CHD5, HRC, WDFY2, B3GALT2, CYP21A2, DTX3, FAM188A, MAN1C1, SP4, ZRANB2, BMPR1B, ATP8A1</i> </p> |
| Homophilic cell adhesion | 26  | 2.79E-09 | <p> <i>CLSTN2, PCDHA3, PCDHGA8, PCDHB15, PCDHGC5, PCDHGA7, PCDHGC4, PCDHGA6, PCDHGA5, PCDHGC3, PCDHGA3, PCDHGA2, DCHS1, PCDHGA1, FAT4, ROBO1, CDH23, PCDHGA11, PCDH11X, PCDHB4, PCDH10, PCDH9, PCDHGB6, PCDHGB2, PCDH19, PCDHGB5, PCDH18, PCDHGB4</i> </p>                                                                                                                                                                                                                                                                                                                                                                                                                                                                                                                                                                                                                                                                                                                                                                                                                                   |
| Cation binding           | 272 | 3.50E-09 | <p> <i>ADCY2, LTBP3, ATP1B2, SCN3B, LTBP4, SNCA, ZNF781, SYT9, GTF2IRD2B, FAH, ZFP92, PGR, ZFP90, CCBE1, ZNF397, RARA, ZNF395, SCD5, CDH23, ZNF43, MATN2, NUDT16, ZNF641, CGRRF1, RXRA, ZHX1, F8,</i> </p>                                                                                                                                                                                                                                                                                                                                                                                                                                                                                                                                                                                                                                                                                                                                                                                                                                                                                   |

---

NUDT10, NUDT11, LPCAT2, PRDM8, PGM5, PRDM5,  
ZNF383, RYR2, NEK9, PRDM2, TGFB1I1, ADAMTS3,  
ADD1, ZIM2, ZNF519, ZNF132, NEK1, CACNB2,  
CACNB3, ZNF514, ZNF512, RPS27, CDADC1, FAHD2B,  
ZNF70, TRPC1, ASXL3, ZC3H13, ZNF529, CYP46A1,  
KLF12, PCDH10, ZNF621, SMYD4, ZNF521, KLF15,  
PCDH19, PRPSAP2, PCDH18, KCNJ8, HEBP1, SYTL4,  
ZIK1, HEPH, KLF2, PRKRIR, ZBTB33, ZCCHC24,  
CACHD1, PCDHA3, ZNF532, SOBP, ZEB2, GLI2, KCNIP2,  
GLI3, VILL, KCNIP3, SLC23A2, ZNF540, ZNF496,  
MBLAC2, ZNF493, NR2F1, ZBTB22, AR, PCDH11X,  
PCDHB4, ZNF333, ZNF688, PJA2, ZDHHC15, PJA1,  
NAALAD2, ZDHHC17, MAST2, ASH1L, EGFL8, ZNF33B,  
ZNF483, PLA2G5, ZNF275, SCAPER, PCDHB15, ZBTB16,  
DCHS1, PLCL2, ZNF660, CYB561D2, ZFP36L2, PLCL1,  
NR1D1, MORC3, DGKD, NR1D2, FAT4, HAAO, SLC4A8,  
ZNF286A, BAZ2B, RASA4, DTNA, CCNB1IP1, RBM20,  
MEX3B, ZNF25, PDZRN3, SNAI2, TRIM23, ZNF662,  
ZNF358, TRIM21, LRP1, PHF19, PLSCR4, FYN, BNC2,  
SVIL, ZNF862, PHF21A, CHN2, ZBTB2, LRP4, THRA,  
ZAK, APOBEC3G, TRIM52, ZXDA, ZNF181, GATA6,  
RNF38, ZNF442, ZNF575, RNF146, NMNAT3, ZNF594,  
PCDHGA11, GTF2IRD2, CDO1, TRERF1, PLCE1, KCNT2,  
RASGRF2, ZNF197, MFAP4, DST, SLC40A1, PRPS1,  
ME1, TSHZ3, TSHZ2, ZNF430, CXXC4, HEXDC, EXTL2,  
ZC3H6, NR2C2, WT1, TRIM68, TTYH2, SRR, ZNF425,  
ZNF599, UNKL, CACNA2D1, SETDB2, TAF3, SMG6,  
SYT11, LMCD1, ZNF835, TRIM61, FOXP1, EPS15,  
SALL2, PHF2, PHF1, ATF7, EBF1, MTR, ANTXR2,  
RHBDL3, ABL1, ZNF83, CLSTN2, PCDHGA8, ZCWPW2,  
PCDHGA7, ZCWPW1, PCDHGA6, PCDHGA5, PCDHGA3,  
PCDHGA2, PCDHGA1, TRIM4, OSR2, ANG, SETMAR,  
ATP8B2, ANO6, CDK15, ZNF280D, WBSCR17, PCDH9,  
PCDHGB6, PFKM, NRXN1, ZFP28, PCDHGB2,

---

|                               |    |          |                                                                                                                                                                                                                                                                                                                                                                                                                                                                                                                                                                                                                                                                 |
|-------------------------------|----|----------|-----------------------------------------------------------------------------------------------------------------------------------------------------------------------------------------------------------------------------------------------------------------------------------------------------------------------------------------------------------------------------------------------------------------------------------------------------------------------------------------------------------------------------------------------------------------------------------------------------------------------------------------------------------------|
|                               |    |          | <i>PCDHGB5, PCDHGB4, ZMIZ1, ZNF711, ZFPM2,<br/> JMJD1C, PRNP, PROS1, CYP2U1, LOC375196, FKBP7,<br/> PCDHGC5, PCDHGC4, PCDHGC3, PRDM16, NAALADL1,<br/> HIC1, CPZ, ANXA6, SMOC2, AGAP11, ZNF708,<br/> ZC3H12B, ZNF609, PLCD1, EHD2, CHD5, HRC, WDFY2,<br/> B3GALT2, CYP21A2, DTX3, FAM188A, MAN1C1, SP4,<br/> ZNRANB2, BMPR1B, ATP8A1</i>                                                                                                                                                                                                                                                                                                                         |
| Transcription factor activity | 85 | 1.30E-07 | <i>MEF2C, POU6F1, ZNF83, BACH2, ELF2, THRA, ZEB2,<br/> GLI2, RFXAP, GLI3, TCEAL1, FOXO6, ZXDA, HOXC6,<br/> PGR, MAX, HSF2, GATA6, ZNF397, SOX15, RARA,<br/> FOXO3B, ZNF496, TWIST2, NR2F1, SOX10, SATB1, AR,<br/> FOXJ2, RXRA, ZHX1, HMG20A, SPEN, PROX1, TRERF1,<br/> FOXN3, PURA, ZNF197, PRDM2, ZNF33B, ZNF483,<br/> ZIM2, TSHZ3, TSHZ2, ZNF132, TADA3, SCML1, NFIX,<br/> ZBTB16, NR2C2, WT1, ARNT, HIC1, ZFP36L2, TSC22D3,<br/> MEIS2, NR1D1, NR1D2, HAND2, TFDP2, TEF, TCF4,<br/> ZNF70, MAF, SMAD9, TBX3, KLF12, SMAD5, TAF7,<br/> KLF15, FOXP1, PKNOX2, SALL2, CSRNP3, PHF1,<br/> DMTF1, ATF7, SP4, EBF1, ZNRANB2, PBX1, KLF2, NFIC,<br/> NFIA, NFIB</i> |

---

**Supplementary Table S5.** Top 10 pathways enriched in high-grade serous carcinoma *versus* normal tissues

| GO Term          | Count | P value  | Genes                                                                                                                                                                                                                                                                                                                                                                                                                                                |
|------------------|-------|----------|------------------------------------------------------------------------------------------------------------------------------------------------------------------------------------------------------------------------------------------------------------------------------------------------------------------------------------------------------------------------------------------------------------------------------------------------------|
| M phase          | 50    | 1.10E-46 | <i>KIF23, KIF22, KIFC1, XRCC2, PRC1, NEK2, TTK, AURKA, PTTG1, AURKB, CEP55, FAM83D, KIF2C, SPC25, NCAPH, CDCA8, DDX11, NCAPG, BUB1, SKA3, SKA1, CDCA5, ASPM, ERCC6L, CDCA3, TRIP13, CDK1, KIF11, MKI67, SGOL1, KIF15, CCNF, TPX2, NUF2, KIF18A, CDC20, BIRC5, NDC80, ESPL1, TACC3, RAD54L, NCAPD2, RAD51, MAD2L1, CCNB2, PLK1, CKS2, BUB1B, CIT, KPNA2</i>                                                                                           |
| Cell cycle phase | 52    | 2.08E-44 | <i>KIF23, KIFC1, KIF22, XRCC2, PRC1, TTK, AURKA, AURKB, PTTG1, GTSE1, FAM83D, KIF2C, CDCA8, DDX11, CDCA5, ASPM, CDCA3, CDK1, KIF11, CCNF, KIF15, SGOL1, TPX2, ESPL1, TACC3, RAD51, NCAPD2, MAD2L1, BUB1B, KPNA2, BLM, NEK2, CEP55, SPC25, NCAPH, NCAPG, BUB1, SKA3, SKA1, TRIP13, ERCC6L, MKI67, KIF18A, NUF2, NDC80, BIRC5, CDC20, RAD54L, CCNB2, PLK1, CKS2, CIT</i>                                                                               |
| Cell cycle       | 63    | 1.84E-43 | <i>KIF23, KIF22, KIFC1, E2F3, XRCC2, PRC1, E2F7, TTK, AURKA, PTTG1, AURKB, GTSE1, FAM83D, KIF2C, CDCA8, DDX11, FANCI, CDCA5, ASPM, CDCA3, CDK1, KIF11, SGOL1, CCNF, KIF15, TPX2, ESPL1, TACC3, NCAPD2, RAD51, KRT18, MAD2L1, BUB1B, KPNA2, CKS1B, BLM, NEK2, FOXM1, CEP55, LLGL2, SPC25, NCAPH, NCAPG, HJURP, BUB1, SKA3, SKA1, ERCC6L, TRIP13, PARD6B, MKI67, PSRC1, KIF18A, NUF2, CDC20, BIRC5, NDC80, RACGAP1, RAD54L, CCNB2, PLK1, CKS2, CIT</i> |
| Mitosis          | 40    | 8.58E-40 | <i>KIF23, KIF22, KIFC1, NEK2, AURKA, PTTG1, CEP55, AURKB, FAM83D, KIF2C, SPC25, NCAPH, CDCA8, DDX11, NCAPG, BUB1, SKA3, SKA1, CDCA5, ASPM, ERCC6L, CDCA3, CDK1, KIF11, SGOL1, KIF15, CCNF, TPX2, NUF2, KIF18A, CDC20, BIRC5, NDC80, ESPL1,</i>                                                                                                                                                                                                       |



|                               |    |          |                                                                                                                                                                                                                                                                                                                                                                                 |
|-------------------------------|----|----------|---------------------------------------------------------------------------------------------------------------------------------------------------------------------------------------------------------------------------------------------------------------------------------------------------------------------------------------------------------------------------------|
|                               |    |          | <i>NCAPD2, MAD2L1, CCNB2, PLK1, BUB1B, CIT</i>                                                                                                                                                                                                                                                                                                                                  |
| Nuclear division              | 40 | 8.58E-40 | <i>KIF23, KIF22, KIFC1, NEK2, AURKA, PTTG1, CEP55, AURKB, FAM83D, KIF2C, SPC25, NCAPH, CDCA8, DDX11, NCAPG, BUB1, SKA3, SKA1, CDCA5, ASPM, ERCC6L, CDCA3, CDK1, KIF11, SGOL1, KIF15, CCNF, TPX2, NUF2, KIF18A, CDC20, BIRC5, NDC80, ESPL1, NCAPD2, MAD2L1, CCNB2, PLK1, BUB1B, CIT</i>                                                                                          |
| M phase of mitotic cell cycle | 40 | 1.81E-39 | <i>KIF23, KIF22, KIFC1, NEK2, AURKA, PTTG1, CEP55, AURKB, FAM83D, KIF2C, SPC25, NCAPH, CDCA8, DDX11, NCAPG, BUB1, SKA3, SKA1, CDCA5, ASPM, ERCC6L, CDCA3, CDK1, KIF11, SGOL1, KIF15, CCNF, TPX2, NUF2, KIF18A, CDC20, BIRC5, NDC80, ESPL1, NCAPD2, MAD2L1, CCNB2, PLK1, BUB1B, CIT</i>                                                                                          |
| Organelle fission             | 40 | 4.49E-39 | <i>KIF23, KIF22, KIFC1, NEK2, AURKA, PTTG1, CEP55, AURKB, FAM83D, KIF2C, SPC25, NCAPH, CDCA8, DDX11, NCAPG, BUB1, SKA3, SKA1, CDCA5, ASPM, ERCC6L, CDCA3, CDK1, KIF11, SGOL1, KIF15, CCNF, TPX2, NUF2, KIF18A, CDC20, BIRC5, NDC80, ESPL1, NCAPD2, MAD2L1, CCNB2, PLK1, BUB1B, CIT</i>                                                                                          |
| Cell cycle process            | 53 | 9.36E-39 | <i>KIF23, KIFC1, KIF22, XRCC2, PRC1, TTK, AURKA, AURKB, PTTG1, GTSE1, FAM83D, KIF2C, CDCA8, DDX11, CDCA5, ASPM, CDCA3, CDK1, KIF11, CCNF, KIF15, SGOL1, TPX2, ESPL1, TACC3, RAD51, NCAPD2, MAD2L1, BUB1B, KPNA2, BLM, NEK2, CEP55, SPC25, NCAPH, NCAPG, BUB1, SKA3, SKA1, TRIP13, ERCC6L, MKI67, KIF18A, NUF2, NDC80, BIRC5, CDC20, RACGAP1, RAD54L, CCNB2, PLK1, CKS2, CIT</i> |
| Mitotic cell cycle            | 45 | 3.16E-37 | <i>KIF23, KIF22, KIFC1, PRC1, BLM, NEK2, TTK, AURKA, PTTG1, CEP55, AURKB, GTSE1, FAM83D, KIF2C, SPC25, NCAPH, CDCA8, DDX11, NCAPG, BUB1, SKA3, SKA1, CDCA5, ASPM, ERCC6L, CDCA3, CDK1, KIF11, SGOL1, KIF15, CCNF, TPX2, NUF2, KIF18A, CDC20, BIRC5, NDC80, ESPL1, NCAPD2, MAD2L1,</i>                                                                                           |

---

|               |    |          |                                                                                                                                                                                                                                                                                  |
|---------------|----|----------|----------------------------------------------------------------------------------------------------------------------------------------------------------------------------------------------------------------------------------------------------------------------------------|
|               |    |          | <i>CCNB2, PLK1, BUB1B, CIT, KPNA2</i>                                                                                                                                                                                                                                            |
| Cell division | 39 | 2.87E-33 | <i>KIF23, CKS1B, KIFC1, PRC1, NEK2, PTTG1, CEP55, AURKB, LLGL2, FAM83D, SPC25, NCAPH, CDCA8, NCAPG, BUB1, SKA3, SKA1, CDCA5, ASPM, ERCC6L, CDCA3, PARD6B, CDK1, KIF11, SGOL1, CCNF, NUF2, CDC20, BIRC5, NDC80, ESPL1, RACGAP1, NCAPD2, MAD2L1, CCNB2, PLK1, CKS2, BUB1B, CIT</i> |

---

**Supplementary Table S6.** Top 10 pathways enriched in normal tissues *versus* high-grade serous carcinoma

| GO Term                                                     | Count | P value  | Genes                                                    |
|-------------------------------------------------------------|-------|----------|----------------------------------------------------------|
| Blood vessel development                                    | 10    | 4.25E-05 | <i>RECK, CAV1, ANG, HAND2, LEPR, CCBE1, RHOB, NR2F2,</i> |
| Vasculature development                                     | 10    | 5.13E-05 | <i>RECK, CAV1, ANG, HAND2, LEPR, CCBE1, RHOB, NR2F2,</i> |
| Blood vessel morphogenesis                                  | 9     | 9.29E-05 | <i>CAV1, ANG, HAND2, LEPR, CCBE1, RHOB, NR2F2, FGF2,</i> |
| Muscle organ development                                    | 9     | 9.29E-05 | <i>LAMA2, POU6F1, CAV1, SVIL, MRAS, CACNA1H, CACNB</i>   |
| Angiogenesis                                                | 7     | 5.10E-04 | <i>ANG, HAND2, LEPR, CCBE1, RHOB, FGF2, ENG</i>          |
| Chondroitin sulfate<br>biosynthetic process                 | 3     | 1.25E-03 | <i>CSGALNACT1, CHST7, CHST3</i>                          |
| Chondroitin sulfate<br>proteoglycan biosynthetic<br>process | 3     | 2.42E-03 | <i>CSGALNACT1, CHST7, CHST3</i>                          |
| Chondroitin sulfate metabolic<br>process                    | 3     | 3.95E-03 | <i>CSGALNACT1, CHST7, CHST3</i>                          |
| Negative regulation of cellular<br>biosynthetic process     | 11    | 4.72E-03 | <i>CAV1, TSPYL2, ANG, PPARG, ZEB2, NR2F2, FGF2, ENG,</i> |
| Extracellular structure<br>organization                     | 6     | 5.06E-03 | <i>CSGALNACT1, RECK, PDGFRA, CACNB2, ECM2, ENG</i>       |

**Supplementary Table S7.** Top 10 pathways enriched in clear cell carcinoma *versus* high-grade serous carcinoma

| GO Term                                   | Count | P value  | Genes                                                                                                                                                                                             |
|-------------------------------------------|-------|----------|---------------------------------------------------------------------------------------------------------------------------------------------------------------------------------------------------|
| Wound healing                             | 14    | 1.51E-06 | <i>KNG1, B4GALT1, GNA13, NOG, ITGA2, FGG, HIF1A, HNF4A, FGA, FGB, F3, F2, IGFBP1, PAPSS2</i>                                                                                                      |
| Regulation of cell proliferation          | 29    | 1.53E-06 | <i>RBP4, NOG, FGFR4, IGFBP7, MITF, PNP, ITCH, ASPH, LAMB1, THPO, B4GALT1, HYAL1, COL4A3, TESC, HCLS1, ITGA2, GJB6, PTHLH, CDKN1A, CTH, HIF1A, HNF4A, COG8, SSTR1, DLX5, F3, SCIN, LAMC1, TOB2</i> |
| Coagulation                               | 10    | 8.10E-06 | <i>GNA13, KNG1, FGG, HNF4A, FGA, FGB, F3, F2, ITGA2, PAPSS2</i>                                                                                                                                   |
| Blood coagulation                         | 10    | 8.10E-06 | <i>GNA13, KNG1, FGG, HNF4A, FGA, FGB, F3, F2, ITGA2, PAPSS2</i>                                                                                                                                   |
| Hemostasis                                | 10    | 1.29E-05 | <i>GNA13, KNG1, FGG, HNF4A, FGA, FGB, F3, F2, ITGA2, PAPSS2</i>                                                                                                                                   |
| Negative regulation of cell proliferation | 17    | 2.43E-05 | <i>B4GALT1, RBP4, COL4A3, HYAL1, TESC, NOG, IGFBP7, GJB6, PTHLH, CTH, CDKN1A, HNF4A, SSTR1, SCIN, ASPH, ITCH, TOB2</i>                                                                            |
| Regulation of body fluid levels           | 10    | 1.06E-04 | <i>GNA13, KNG1, FGG, HNF4A, FGA, FGB, F3, F2, ITGA2, PAPSS2</i>                                                                                                                                   |
| Response to wounding                      | 19    | 2.34E-04 | <i>B4GALT1, GNA13, KNG1, NOG, ITGA2, FGG, HIF1A, FGA, HNF4A, FGB, F3, F2, MGLL, RTN4RL2, LBP, IGFBP1, ITCH, PAPSS2, BLNK</i>                                                                      |
| Cell surface binding                      | 5     | 6.47E-04 | <i>FGG, FGA, FGB, F3, LBP</i>                                                                                                                                                                     |
| Platelet activation                       | 5     | 7.98E-04 | <i>GNA13, FGG, FGA, FGB, F2</i>                                                                                                                                                                   |

**Supplementary Table S8.** Top 10 pathways enriched in high-grade serous carcinoma *versus* clear cell carcinoma

| GO Term                                    | Count | P value  | Genes                                                                                                                                                                                                                          |
|--------------------------------------------|-------|----------|--------------------------------------------------------------------------------------------------------------------------------------------------------------------------------------------------------------------------------|
| Transcription                              | 27    | 9.17E-04 | <i>ZNF519, ZNF827, CTCFL, NFIX, MEIS1, TCF7L2, FOXO6, WT1, ZNF512, ZFP92, NPAS3, PPP1R1B, PER3, BHLHE41, BAZ2B, PHOX2A, SSBP3, KLF12, ESR1, SPEN, ZNF334, EYA2, CDCA7L, PBX1, ZNF99, HDAC7, NFIB</i>                           |
| Regulation of transcription                | 31    | 1.05E-03 | <i>ZNF519, CRABP2, ZNF827, CTCFL, NFIX, MEIS1, TCF7L2, WT1, ZNF512, FOXO6, ZFP92, NPAS3, PER3, BAZ2B, BHLHE41, PHOX2A, SSBP3, KLF12, EMX2, ESR1, SPEN, ABCG4, ZNF334, PRKCQ, EYA2, CDCA7L, PBX1, LRCH4, ZNF99, HDAC7, NFIB</i> |
| DNA binding                                | 26    | 1.83E-03 | <i>ZNF519, ZNF827, ABI2, CTCFL, NFIX, MEIS1, TCF7L2, WT1, ZNF512, FOXO6, ZFP92, NPAS3, BHLHE41, BAZ2B, PHOX2A, SSBP3, KLF12, CBL, EMX2, ESR1, SPEN, ZNF334, H2AFY2, PBX1, ZNF99, NFIB</i>                                      |
| Neuron differentiation                     | 10    | 2.50E-03 | <i>PHOX2A, PRKCQ, GPC2, RET, DRD2, CLIC5, EMX2, NTNG1, ABI2, IGSF9</i>                                                                                                                                                         |
| Transcription regulator activity           | 19    | 3.17E-03 | <i>PHOX2A, CUTA, SSBP3, KLF12, CBL, EMX2, ESR1, CTCFL, NFIX, SPEN, MEIS1, TCF7L2, FOXO6, WT1, NPAS3, PBX1, LRCH4, BHLHE41, NFIB</i>                                                                                            |
| Embryonic morphogenesis                    | 8     | 4.34E-03 | <i>RET, EYA2, CLIC5, VANGL2, CRABP2, AMOT, PBX1, TCF7L2</i>                                                                                                                                                                    |
| Transcription factor activity              | 14    | 5.08E-03 | <i>PHOX2A, KLF12, EMX2, CBL, ESR1, NFIX, SPEN, TCF7L2, MEIS1, FOXO6, WT1, PBX1, BHLHE41, NFIB</i>                                                                                                                              |
| Regulation of RNA metabolic process        | 21    | 1.45E-02 | <i>PHOX2A, ZNF519, KLF12, CRABP2, EMX2, ESR1, NFIX, SPEN, MEIS1, TCF7L2, FOXO6, WT1, ZNF334, ZFP92, NPAS3, RBM38, PBX1, PER3, BHLHE41, ZNF99, NFIB</i>                                                                         |
| Epithelium development                     | 6     | 1.77E-02 | <i>RET, VANGL2, TGM1, PBX1, CDSN, WT1</i>                                                                                                                                                                                      |
| Regulation of transcription, DNA-dependent | 20    | 2.28E-02 | <i>PHOX2A, ZNF519, KLF12, CRABP2, EMX2, ESR1, NFIX, SPEN, MEIS1, TCF7L2, FOXO6, WT1, ZNF334, ZFP92, NPAS3, PBX1, PER3, BHLHE41, ZNF99, NFIB</i>                                                                                |

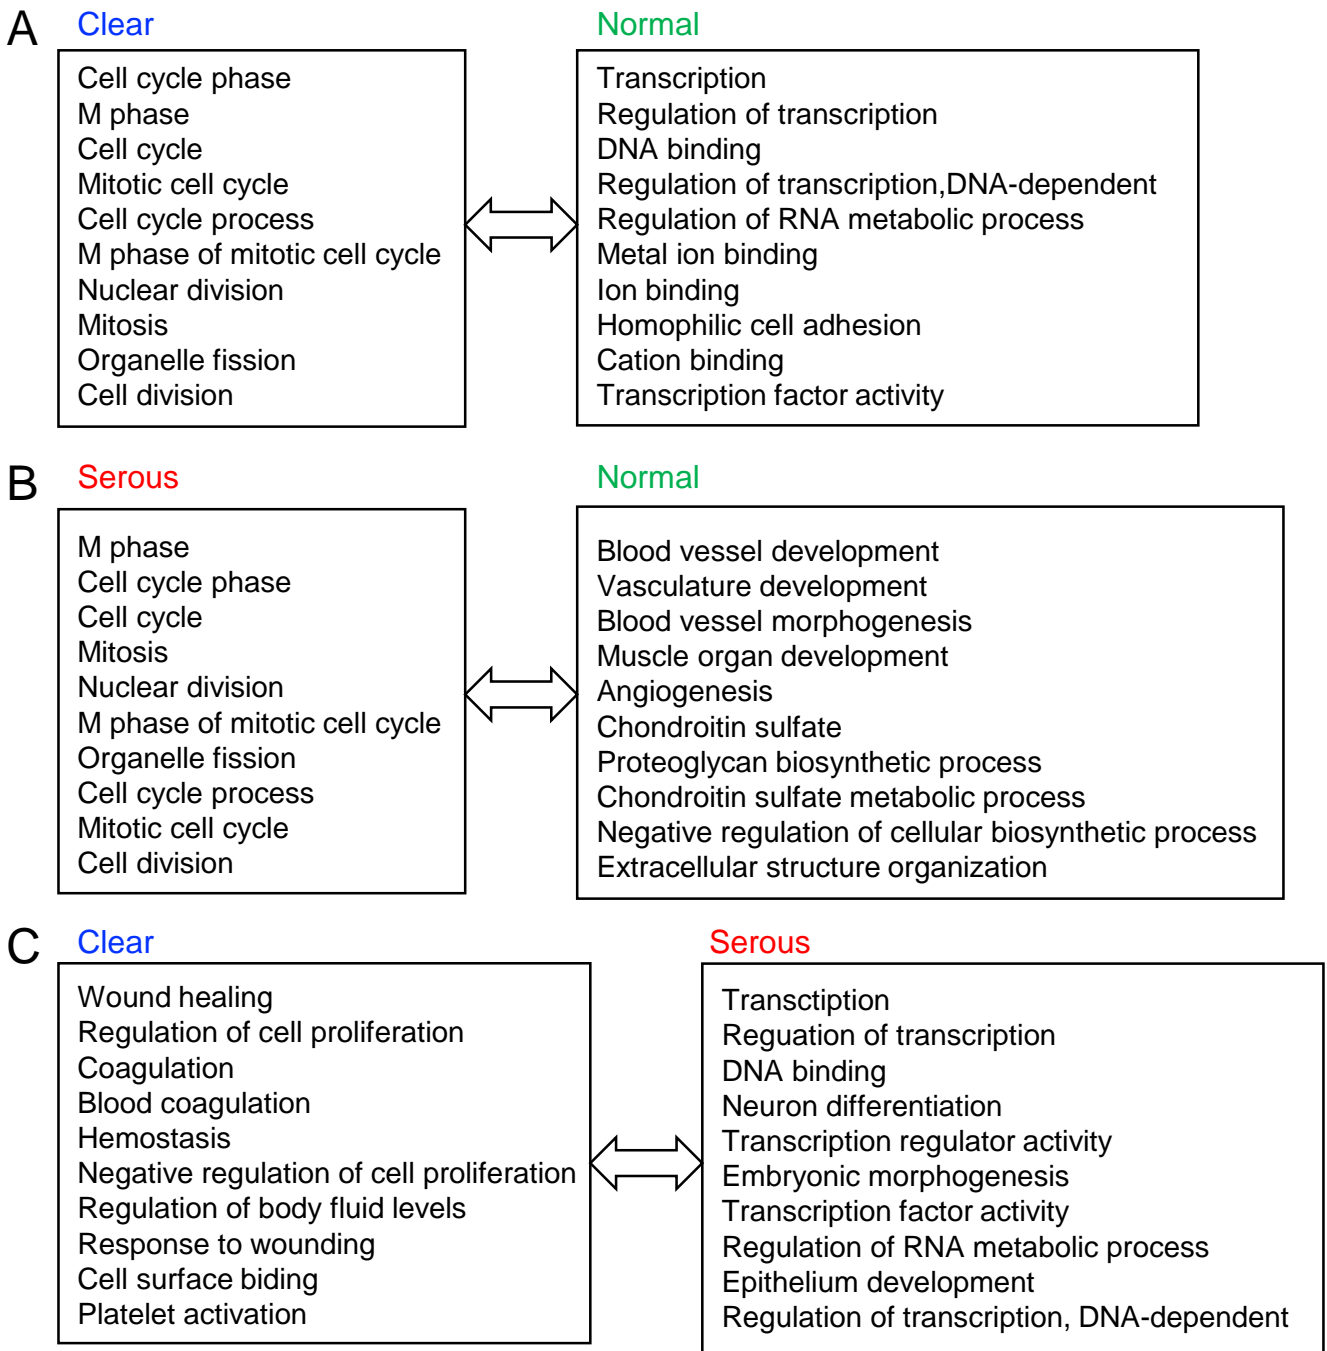

**Supplementary Figure S1.** Pathway enrichment analysis using PC1-contributing genes in PCA. Principal component analysis (PCA) was performed based on the expression level represented by log2RPKM value for each RefSeq CCC, HGSC, and normal tissues. DAVID Bioinformatics Resources 6.7 showed differentially expressed genes in pathways and clusters of functionally related genes in clear cell carcinoma compared to normal tissues (A), in serous carcinoma compared to normal tissues (B), and in clear cell carcinoma compared to serous carcinoma (C).

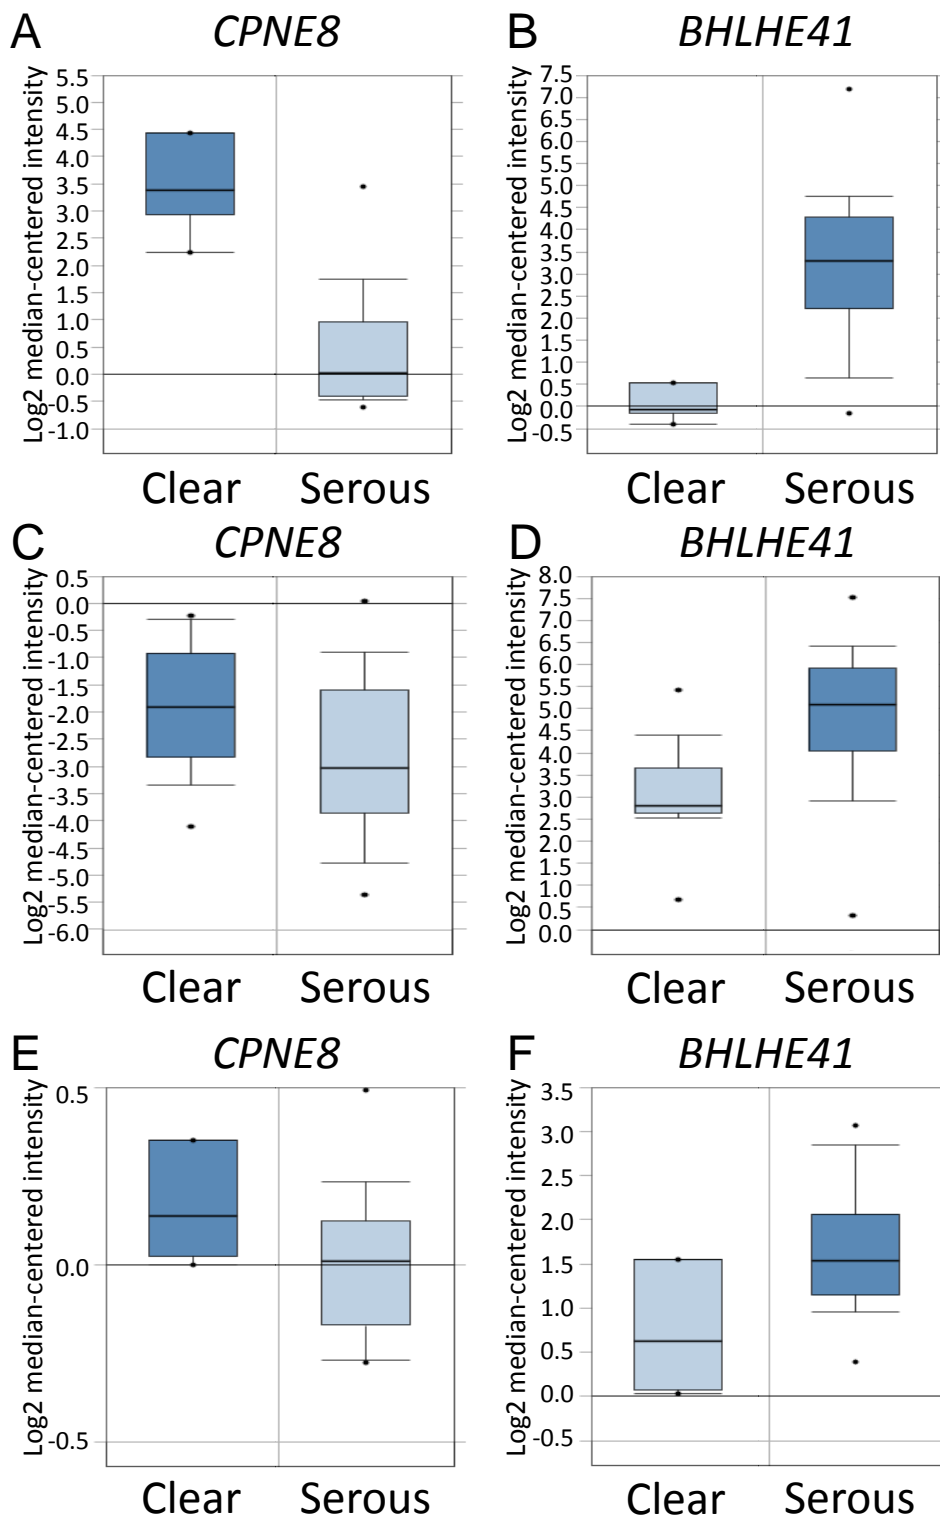

**Supplementary Figure S2.** Gene expression levels of *CPNE8* and *BHLHE41* based on Oncomine. (A) *CPNE8* was expressed higher in clear cell carcinoma ( $n = 6$ ) than in serous carcinoma ( $n = 71$ ) among Meyniel Ovarian Statistics ( $n = 140$ ). (B) *BHLHE41* was expressed higher in serous carcinoma than in clear cell carcinoma among the same dataset with (A). (C) *CPNE8* was expressed higher in clear cell carcinoma ( $n = 13$ ) than in serous carcinoma ( $n = 79$ ) among Bittner Ovarian Statistics ( $n = 241$ ). (D) *BHLHE41* was expressed higher in serous carcinoma than in clear cell carcinoma among the same dataset with (C). (E) *CPNE8* was expressed higher in clear cell carcinoma ( $n = 7$ ) than in serous carcinoma ( $n = 20$ ) among Lu Ovarian Statistics ( $n = 50$ ). (F) *BHLHE41* was expressed higher in serous carcinoma than in clear cell carcinoma among the same dataset with (E).

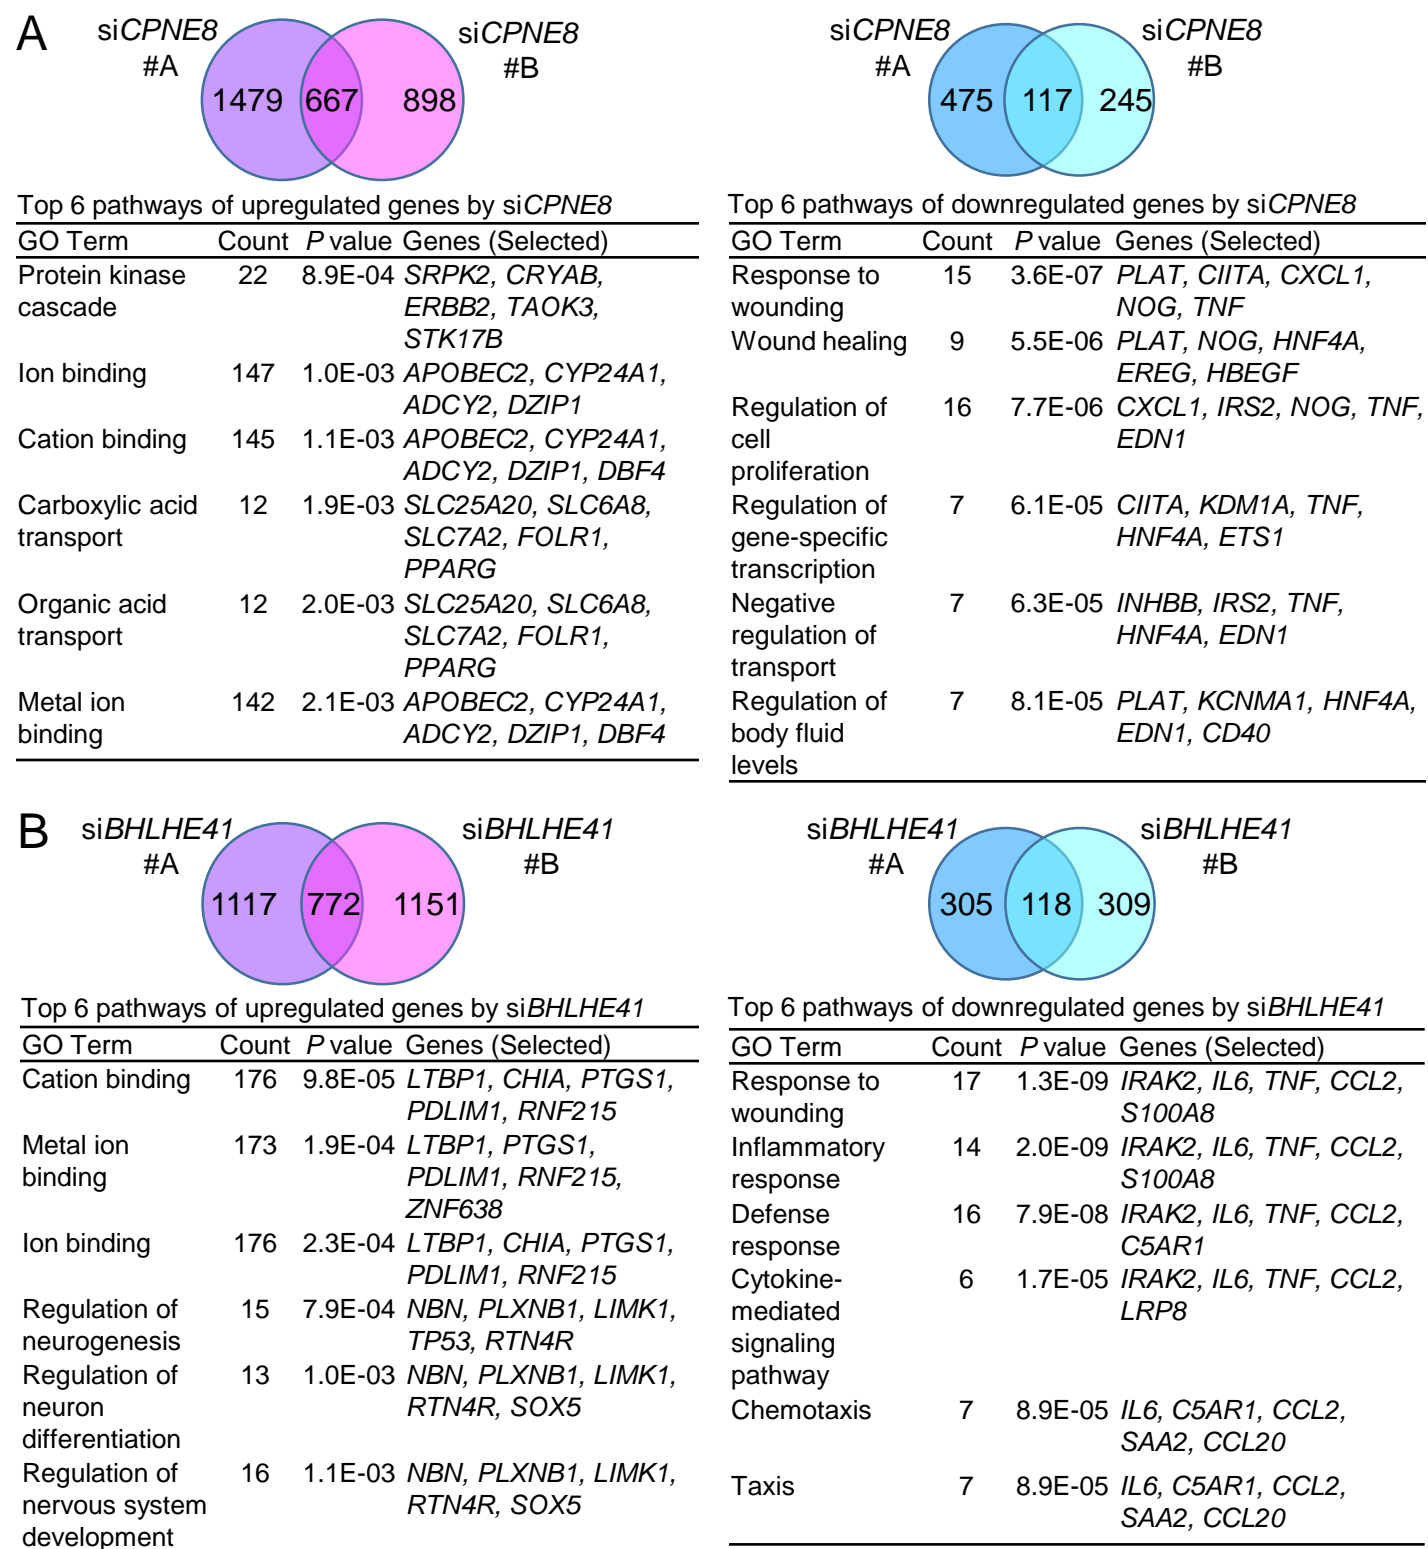

**Supplementary Figure S3.** Up- and down-regulated pathway genes by siRNAs targeting *CPNE8* and *BHLHE41*. (A) Venn diagram showing the number of overlapping upregulated (>1.5-fold, left panel) and downregulated (<0.66-fold, right panel) microarray probes in RMG1 cells after treatment of si*CPNE8* #A and #B compared with siControl. Pathway analysis using the overlapping genes shows high enrichment of ion-related and neuron-related pathways in upregulated genes, whereas high enrichment of cytokines and inflammatory pathways in downregulated genes. (B) Similar microarray analysis was performed as in (A) except that OVCAR3 cells and si*BHLHE41* #A and #B were used. Pathway analysis shows high enrichment of protein kinase and ion-related pathways in upregulated genes, whereas high enrichment of wound response and cell proliferation pathways in downregulated genes.
